# Supplementary material
Source: publisher figshare collection journal article supplement (https://karger.figshare.com/ndownloader/files/14479400)
Supplement: Supplementary file 1 [file 14479400]

**Supplementary Table 1.** Mean number (±SEM) of c-Fos+ neurons and cFos+ tdTomato+ neurons detected in *Kiss1CreEGFP/wt/Rosa26lox-stop-lox-tdTomato/wt* male mice after exposure to water (control) or female urine (n = 6 in each group) in the anterior medial amygdaloid nucleus (MeAa), posteroventral medial amygdaloid nucleus (MeApv) and posterodorsal medial amygdaloid nucleus (MeApd) and the corresponding unpaired two-tailed student’s *t*-test analysis.

|  | Control | | Urine exposed | |
| --- | --- | --- | --- | --- |
| c-Fos+ neurons | c-Fos+ tdTomato+ neurons | c-Fos+ neurons | c-Fos+ tdTomato+ neurons |
| MeAa | 13.5 ± 3.5 | 1.3 ± 0.6 | 18.5 ± 4.3 | 3.4 ± 0.6a |
| MeApv | 29.2 ± 3.3 | 2 ± 0.2 | 45.3 ± 5.2a | 5.4 ± 0.7c |
| MeApd | 43.3 ± 5.7 | 3.6 ± 0.5 | 66.8 ± 3.7b | 8.6 ± 0.8c |
| Total | 85 ± 10.6 | 6.8 ± 0.7 | 131 ± 9.8b | 17.4 ± 1.1c |

a P<0.05 vs control subjects (unpaired two-tailed student’s *t*-test)

b P<0.01 vs control subjects (unpaired two-tailed student’s *t*-test)

c P<0.001 vs control subjects (unpaired two-tailed student’s *t*-test)
